# Supplementary material
Source: publisher figshare collection journal article supplement (https://acs.figshare.com/ndownloader/files/4483264)
Supplement: Supplementary file 1 [file 4483264]

data_global

_audit_creation_date               10-03-06


_publ_contact_author_name
;

Pierre Braunstein

;
_publ_contact_author_address

;


Institut Le Bel, rue Blaise Pascal, 67081 STRASBOURG, FRANCE

;
_publ_contact_author_phone         '0368851308'
_publ_contact_author_fax           '0368851322'
_publ_contact_author_email          braunstein@unistra.fr

_publ_requested_journal            'Inorg. Chem.'
_publ_contact_letter
;
;

_publ_requested_category            FM

_publ_section_title
; 

Heterometallic Chains and Clusters with Gold-Transition 
Metal Bonds: Synthesis and Interconversion

;

loop_
_publ_author_name
_publ_author_address

'SCULFORT Sabrina'
;
 
 Laboratoire de Chimie de coordination, UMR CNRS 7177
 Universit\'e de Strasbourg
 Strasbourg
 France

;

'BRAUNSTEIN Pierre'
;
 
 Laboratoire de Chimie de coordination, UMR CNRS 7177
 Universit\'e de Strasbourg
 Strasbourg
 France

;

'WELTER Richard'
;
 
 Laboratoire DECOMET, UMR CNRS 7177
 Universit\'e Louis Pasteur
 4, rue Blaise Pascal 67000 STRASBOURG, France

;

_publ_section_abstract
; ?
;

_publ_section_comment
; ?
;

_publ_section_exptl_prep
; ?
;


_publ_section_exptl_refinement
; ?
;


_publ_section_references
;

Burla, M.C., Camalli, M., Cascarano, G.,Giacovazzo, C., Polidori, G.,
Spagna, R. &Viterbo, D. (1989).  SIR.  J. Appl. Cryst. 22, 389-393.

Dowty, E. (1994). ATOMS for Mac. Version 3.0. Shape Software,
521 Hidden Valley Road, Kingsport, TN 37663, E-U.

KappaCCD Operation Manual (1997), Nonius B.V., Delft, The Nederlands.

Otwinowski, Z. & Minor, W. (1997), Methods in Enzymology, 276, 307-326.

Sheldrick, G.M. (1997). SHELXL97. Program for the refinement
of crystal structures. University of Gottingen. Germany.

Spek, A.L., PLATON 98, Utrecht University, The Netherland, 1998.

;

_publ_section_figure_captions
; ?
;

_publ_section_acknowledgements
; ?
;
 
data_mo4_ag3_cu_ordered_lydia 
 
_audit_creation_method            SHELXL-97 
_chemical_name_systematic 
; 
 ? 
; 
_chemical_name_common             ? 
_chemical_melting_point           ? 
_chemical_formula_moiety          'C39 H20 Ag3 Cu Mo4 O12, C7 H8' 
_chemical_formula_sum 
 'C39 H28 Ag3 Cu Mo4 O12' 
_chemical_formula_weight          1459.52 
_chemical_absolute_configuration  rm 
 
loop_ 
 _atom_type_symbol 
 _atom_type_description 
 _atom_type_scat_dispersion_real 
 _atom_type_scat_dispersion_imag 
 _atom_type_scat_source 
 'C'  'C'   0.0033   0.0016 
 'International Tables Vol C Tables 4.2.6.8 and 6.1.1.4' 
 'H'  'H'   0.0000   0.0000 
 'International Tables Vol C Tables 4.2.6.8 and 6.1.1.4' 
 'Ag'  'Ag'  -0.8971   1.1015 
 'International Tables Vol C Tables 4.2.6.8 and 6.1.1.4' 
 'Cu'  'Cu'   0.3201   1.2651 
 'International Tables Vol C Tables 4.2.6.8 and 6.1.1.4' 
 'Mo'  'Mo'  -1.6832   0.6857 
 'International Tables Vol C Tables 4.2.6.8 and 6.1.1.4' 
 'O'  'O'   0.0106   0.0060 
 'International Tables Vol C Tables 4.2.6.8 and 6.1.1.4' 
 
_symmetry_cell_setting            'monoclinic' 
_symmetry_space_group_name_H-M    'P 21/c' 
_symmetry_space_group_name_Hall   '-P 2ybc' 
 
loop_ 
 _symmetry_equiv_pos_as_xyz 
 'x, y, z' 
 '-x, y+1/2, -z+1/2' 
 '-x, -y, -z' 
 'x, -y-1/2, z-1/2' 
 
_cell_length_a                    17.5163(5) 
_cell_length_b                    12.3964(4) 
_cell_length_c                    22.1469(7) 
_cell_angle_alpha                 90.00 
_cell_angle_beta                  120.54(2) 
_cell_angle_gamma                 90.00 
_cell_volume                      4141.8(9) 
_cell_formula_units_Z             4 
_cell_measurement_temperature     173(2) 
_cell_measurement_reflns_used     16102
_cell_measurement_theta_min        0.998
_cell_measurement_theta_max        30.034
 
_exptl_crystal_description        'prism' 
_exptl_crystal_colour            'yellow orange'
_exptl_crystal_size_max           0.10 
_exptl_crystal_size_mid           0.10 
_exptl_crystal_size_min           0.10 
_exptl_crystal_density_meas       ? 
_exptl_crystal_density_diffrn     2.341 
_exptl_crystal_density_method     'not measured' 
_exptl_crystal_F_000              2784 
_exptl_absorpt_coefficient_mu     3.121 
_exptl_absorpt_correction_type    none 
_exptl_absorpt_correction_T_min   ? 
_exptl_absorpt_correction_T_max   ?
_exptl_absorpt_process_details    ? 
 
_exptl_special_details 
; 
 ? 
; 
 
_diffrn_ambient_temperature       173(2) 
_diffrn_radiation_wavelength      0.71073 
_diffrn_radiation_type            MoK\a 
_diffrn_radiation_source          'fine-focus sealed tube' 
_diffrn_radiation_monochromator   graphite 
_diffrn_measurement_device_type    KappaCCD
_diffrn_measurement_method         '\p scans'  
_diffrn_detector_area_resol_mean  ? 
_diffrn_standards_number          ? 
_diffrn_standards_interval_count  ? 
_diffrn_standards_interval_time   ? 
_diffrn_standards_decay_%         ? 
_diffrn_reflns_number             25862 
_diffrn_reflns_av_R_equivalents   0.0534 
_diffrn_reflns_av_sigmaI/netI     0.0865 
_diffrn_reflns_limit_h_min        -24 
_diffrn_reflns_limit_h_max        24 
_diffrn_reflns_limit_k_min        -15 
_diffrn_reflns_limit_k_max        17 
_diffrn_reflns_limit_l_min        -31 
_diffrn_reflns_limit_l_max        22 
_diffrn_reflns_theta_min          1.35 
_diffrn_reflns_theta_max          30.02 
_reflns_number_total              12097 
_reflns_number_gt                 7188 
_reflns_threshold_expression      >2sigma(I) 
 
_computing_data_collection        'Collect (Nonius B.V., 1998)' 
_computing_cell_refinement        'Denzo (Nonius B.V., 1998)' 
_computing_data_reduction         'Denzo (Nonius B.V., 1998)'
_computing_structure_solution     'SHELXS-97 (Sheldrick, 1997)'
_computing_structure_refinement   'SHELXL-97 (Sheldrick, 1997)' 
_computing_molecular_graphics     'PLATON 98 (Spek, 1998)'
_computing_publication_material   'SHELXL-97 (Sheldrick, 1997)' 
 
_refine_special_details 
; 
 Refinement of F^2^ against ALL reflections.  The weighted R-factor wR and 
 goodness of fit S are based on F^2^, conventional R-factors R are based 
 on F, with F set to zero for negative F^2^. The threshold expression of 
 F^2^ > 2sigma(F^2^) is used only for calculating R-factors(gt) etc. and is 
 not relevant to the choice of reflections for refinement.  R-factors based 
 on F^2^ are statistically about twice as large as those based on F, and R- 
 factors based on ALL data will be even larger. 
; 
 
_refine_ls_structure_factor_coef  Fsqd  
_refine_ls_matrix_type            full 
_refine_ls_weighting_scheme       calc  
_refine_ls_weighting_details 
 'calc w=1/[\s^2^(Fo^2^)+(0.0500P)^2^+0.0000P] where P=(Fo^2^+2Fc^2^)/3' 
_atom_sites_solution_primary      direct 
_atom_sites_solution_secondary    difmap 
_atom_sites_solution_hydrogens    geom 
_refine_ls_hydrogen_treatment    constr
_refine_ls_extinction_method      none 
_refine_ls_extinction_coef        ? 
_refine_ls_number_reflns          12097 
_refine_ls_number_parameters      532 
_refine_ls_number_restraints      0 
_refine_ls_R_factor_all           0.1076 
_refine_ls_R_factor_gt            0.0504 
_refine_ls_wR_factor_ref          0.1314 
_refine_ls_wR_factor_gt           0.1131 
_refine_ls_goodness_of_fit_ref    1.108 
_refine_ls_restrained_S_all       1.108 
_refine_ls_shift/su_max           0.000 
_refine_ls_shift/su_mean          0.000 
 
loop_ 
 _atom_site_label 
 _atom_site_type_symbol 
 _atom_site_fract_x 
 _atom_site_fract_y 
 _atom_site_fract_z 
 _atom_site_U_iso_or_equiv 
 _atom_site_adp_type 
 _atom_site_occupancy 
 _atom_site_symmetry_multiplicity 
 _atom_site_calc_flag 
 _atom_site_refinement_flags 
 _atom_site_disorder_assembly 
 _atom_site_disorder_group 
Ag1 Ag -0.14703(3) -0.28161(4) -0.36128(2) 0.03646(13) Uani 1 1 d . . . 
Ag2 Ag -0.16878(3) -0.39181(5) -0.25500(3) 0.04446(15) Uani 1 1 d . . . 
Ag3 Ag -0.35399(3) -0.36744(4) -0.36768(2) 0.03445(13) Uani 1 1 d . . . 
Mo1 Mo -0.00655(3) -0.30677(4) -0.22131(3) 0.02889(13) Uani 1 1 d . . . 
Mo2 Mo -0.30527(3) -0.47278(4) -0.23888(3) 0.02697(13) Uani 1 1 d . . . 
Mo3 Mo -0.47191(3) -0.22723(4) -0.47716(3) 0.02536(12) Uani 1 1 d . . . 
Mo4 Mo -0.19924(3) -0.30418(4) -0.50451(3) 0.02649(13) Uani 1 1 d . . . 
Cu1 Cu -0.31978(4) -0.27609(6) -0.46790(4) 0.02720(17) Uani 1 1 d . . . 
O1 O -0.3830(3) -0.3130(4) -0.6435(2) 0.0416(12) Uani 1 1 d . . . 
O2 O -0.2440(3) -0.0648(4) -0.4878(3) 0.0493(13) Uani 1 1 d . . . 
O3 O -0.2545(3) -0.5047(4) -0.4486(2) 0.0433(12) Uani 1 1 d . . . 
O4 O -0.4888(3) -0.1265(4) -0.6122(3) 0.0576(14) Uani 1 1 d . . . 
O5 O -0.3040(3) -0.0894(4) -0.3788(3) 0.0527(14) Uani 1 1 d . . . 
O6 O -0.4592(3) -0.4475(4) -0.5415(2) 0.0429(12) Uani 1 1 d . . . 
O7 O -0.1231(3) -0.5188(4) -0.1036(2) 0.0541(14) Uani 1 1 d . . . 
O8 O -0.2926(3) -0.2202(4) -0.2303(3) 0.0494(13) Uani 1 1 d . . . 
O9 O -0.2627(4) -0.6177(4) -0.3340(3) 0.0573(14) Uani 1 1 d . . . 
O10 O 0.0557(3) -0.1616(4) -0.3033(3) 0.0482(13) Uani 1 1 d . . . 
O11 O -0.1375(3) -0.1207(4) -0.2367(3) 0.0578(15) Uani 1 1 d . . . 
O12 O -0.0495(4) -0.5075(4) -0.3199(3) 0.0666(17) Uani 1 1 d . . . 
C31 C -0.0454(4) -0.3388(7) -0.4499(4) 0.0473(19) Uani 1 1 d . . . 
H31 H -0.0084 -0.3481 -0.4007 0.057 Uiso 1 1 calc . . . 
C32 C -0.0903(5) -0.4203(6) -0.4982(4) 0.0479(19) Uani 1 1 d . . . 
H32 H -0.0903 -0.4946 -0.4876 0.058 Uiso 1 1 calc . . . 
C28 C -0.1353(4) -0.3749(7) -0.5646(4) 0.051(2) Uani 1 1 d . . . 
H28 H -0.1706 -0.4126 -0.6074 0.062 Uiso 1 1 calc . . . 
C29 C -0.1192(5) -0.2625(7) -0.5574(4) 0.0489(19) Uani 1 1 d . . . 
H29 H -0.1419 -0.2110 -0.5943 0.059 Uiso 1 1 calc . . . 
C30 C -0.0636(5) -0.2412(7) -0.4856(4) 0.050(2) Uani 1 1 d . . . 
H30 H -0.0423 -0.1723 -0.4651 0.060 Uiso 1 1 calc . . . 
C21 C -0.5408(5) -0.2590(7) -0.4119(5) 0.057(2) Uani 1 1 d . . . 
H21 H -0.5135 -0.3022 -0.3708 0.068 Uiso 1 1 calc . . . 
C22 C -0.5985(5) -0.2956(6) -0.4814(5) 0.055(2) Uani 1 1 d . . . 
H22 H -0.6170 -0.3679 -0.4954 0.066 Uiso 1 1 calc . . . 
C23 C -0.6229(4) -0.2064(8) -0.5249(4) 0.053(2) Uani 1 1 d . . . 
H23 H -0.6606 -0.2080 -0.5744 0.064 Uiso 1 1 calc . . . 
C24 C -0.5843(5) -0.1152(6) -0.4858(5) 0.059(2) Uani 1 1 d . . . 
H24 H -0.5924 -0.0439 -0.5037 0.070 Uiso 1 1 calc . . . 
C20 C -0.5315(5) -0.1446(7) -0.4155(5) 0.055(2) Uani 1 1 d . . . 
H20 H -0.4961 -0.0978 -0.3773 0.066 Uiso 1 1 calc . . . 
C15 C -0.4584(4) -0.5064(6) -0.2920(4) 0.0451(18) Uani 1 1 d . . . 
H15 H -0.4992 -0.4895 -0.3397 0.054 Uiso 1 1 calc . . . 
C16 C -0.4338(4) -0.4388(6) -0.2351(4) 0.0454(18) Uani 1 1 d . . . 
H16 H -0.4542 -0.3671 -0.2372 0.054 Uiso 1 1 calc . . . 
C12 C -0.3734(5) -0.4951(8) -0.1735(4) 0.052(2) Uani 1 1 d . . . 
H12 H -0.3455 -0.4686 -0.1268 0.062 Uiso 1 1 calc . . . 
C13 C -0.3626(5) -0.5972(7) -0.1949(5) 0.059(2) Uani 1 1 d . . . 
H13 H -0.3265 -0.6533 -0.1646 0.071 Uiso 1 1 calc . . . 
C14 C -0.4125(5) -0.6039(6) -0.2670(5) 0.058(2) Uani 1 1 d . . . 
H14 H -0.4152 -0.6639 -0.2947 0.070 Uiso 1 1 calc . . . 
C6 C 0.0614(6) -0.2590(8) -0.1036(4) 0.062(2) Uani 1 1 d . . . 
H6 H 0.0430 -0.1972 -0.0889 0.074 Uiso 1 1 calc . . . 
C7 C 0.0298(5) -0.3597(8) -0.1086(4) 0.054(2) Uani 1 1 d . . . 
H7 H -0.0152 -0.3805 -0.0989 0.065 Uiso 1 1 calc . . . 
C8 C 0.0731(6) -0.4269(6) -0.1299(4) 0.070(3) Uani 1 1 d . . . 
H8 H 0.0640 -0.5025 -0.1367 0.084 Uiso 1 1 calc . . . 
C4 C 0.1335(4) -0.3661(9) -0.1402(4) 0.062(3) Uani 1 1 d . . . 
H4 H 0.1721 -0.3918 -0.1554 0.075 Uiso 1 1 calc . . . 
C5 C 0.1246(5) -0.2597(7) -0.1232(4) 0.058(2) Uani 1 1 d . . . 
H5 H 0.1564 -0.1989 -0.1249 0.069 Uiso 1 1 calc . . . 
C27 C -0.3169(4) -0.3093(5) -0.5911(3) 0.0305(14) Uani 1 1 d . . . 
C25 C -0.2304(4) -0.1559(6) -0.4892(3) 0.0347(15) Uani 1 1 d . . . 
C26 C -0.2386(4) -0.4241(6) -0.4665(3) 0.0338(15) Uani 1 1 d . . . 
C19 C -0.4791(4) -0.1634(5) -0.5614(3) 0.0346(15) Uani 1 1 d . . . 
C18 C -0.3601(4) -0.1465(6) -0.4160(3) 0.0358(15) Uani 1 1 d . . . 
C17 C -0.4550(4) -0.3669(5) -0.5135(3) 0.0307(14) Uani 1 1 d . . . 
C11 C -0.1872(4) -0.4987(5) -0.1551(3) 0.0361(15) Uani 1 1 d . . . 
C10 C -0.2925(4) -0.3131(6) -0.2368(3) 0.0372(16) Uani 1 1 d . . . 
C9 C -0.2746(4) -0.5550(6) -0.3009(4) 0.0387(16) Uani 1 1 d . . . 
C3 C 0.0289(4) -0.2178(6) -0.2767(3) 0.0389(16) Uani 1 1 d . . . 
C1 C -0.0981(4) -0.1932(6) -0.2378(4) 0.0418(17) Uani 1 1 d . . . 
C2 C -0.0409(5) -0.4303(6) -0.2882(4) 0.0475(19) Uani 1 1 d . . . 
C34 C 0.1932(5) -0.2998(6) -0.3500(4) 0.051(2) Uani 1 1 d . . . 
H34 H 0.1545 -0.2632 -0.3385 0.062 Uiso 1 1 calc . . . 
C35 C 0.1852(5) -0.2837(6) -0.4159(4) 0.052(2) Uani 1 1 d . . . 
H35 H 0.1414 -0.2355 -0.4485 0.063 Uiso 1 1 calc . . . 
C36 C 0.2396(5) -0.3365(7) -0.4336(4) 0.0481(19) Uani 1 1 d . . . 
H36 H 0.2337 -0.3263 -0.4783 0.058 Uiso 1 1 calc . . . 
C37 C 0.3036(4) -0.4056(6) -0.3846(4) 0.0466(18) Uani 1 1 d . . . 
H37 H 0.3419 -0.4427 -0.3962 0.056 Uiso 1 1 calc . . . 
C38 C 0.3128(4) -0.4213(6) -0.3215(4) 0.050(2) Uani 1 1 d . . . 
H38 H 0.3576 -0.4688 -0.2892 0.060 Uiso 1 1 calc . . . 
C33 C 0.2573(5) -0.3688(6) -0.3019(4) 0.0503(19) Uani 1 1 d . . . 
C39 C 0.2675(7) -0.3873(9) -0.2327(5) 0.090(3) Uani 1 1 d . . . 
H39A H 0.2469 -0.3236 -0.2188 0.136 Uiso 1 1 calc . . . 
H39B H 0.3300 -0.4004 -0.1983 0.136 Uiso 1 1 calc . . . 
H39C H 0.2322 -0.4501 -0.2349 0.136 Uiso 1 1 calc . . . 
 
loop_ 
 _atom_site_aniso_label 
 _atom_site_aniso_U_11 
 _atom_site_aniso_U_22 
 _atom_site_aniso_U_33 
 _atom_site_aniso_U_23 
 _atom_site_aniso_U_13 
 _atom_site_aniso_U_12 
Ag1 0.0331(3) 0.0409(3) 0.0242(2) 0.0009(2) 0.0065(2) 0.0020(2) 
Ag2 0.0320(3) 0.0521(4) 0.0446(3) 0.0039(3) 0.0161(2) -0.0080(3) 
Ag3 0.0341(3) 0.0387(3) 0.0252(2) 0.0068(2) 0.0112(2) 0.0076(2) 
Mo1 0.0228(2) 0.0289(3) 0.0259(3) 0.0008(2) 0.0058(2) 0.0007(2) 
Mo2 0.0242(2) 0.0316(3) 0.0229(3) 0.0013(2) 0.0103(2) 0.0007(2) 
Mo3 0.0234(2) 0.0225(3) 0.0268(3) 0.0014(2) 0.0103(2) 0.0010(2) 
Mo4 0.0226(2) 0.0304(3) 0.0238(3) -0.0002(2) 0.0098(2) -0.0024(2) 
Cu1 0.0206(3) 0.0308(4) 0.0313(4) -0.0001(3) 0.0141(3) 0.0017(3) 
O1 0.030(2) 0.053(3) 0.029(3) 0.000(2) 0.005(2) -0.009(2) 
O2 0.063(3) 0.031(3) 0.057(3) -0.003(3) 0.033(3) -0.005(3) 
O3 0.053(3) 0.030(3) 0.051(3) 0.005(2) 0.030(3) -0.001(2) 
O4 0.070(4) 0.058(4) 0.047(3) 0.021(3) 0.031(3) 0.009(3) 
O5 0.044(3) 0.054(3) 0.052(3) -0.024(3) 0.018(2) -0.015(3) 
O6 0.045(3) 0.031(3) 0.048(3) -0.013(2) 0.020(2) -0.007(2) 
O7 0.032(3) 0.063(4) 0.040(3) 0.011(3) -0.002(2) -0.002(2) 
O8 0.064(3) 0.038(3) 0.057(3) -0.006(3) 0.038(3) -0.004(3) 
O9 0.084(4) 0.046(3) 0.061(4) -0.005(3) 0.050(3) 0.011(3) 
O10 0.056(3) 0.048(3) 0.050(3) 0.010(3) 0.034(3) 0.004(3) 
O11 0.047(3) 0.041(3) 0.076(4) -0.008(3) 0.024(3) 0.017(3) 
O12 0.076(4) 0.033(3) 0.053(3) -0.006(3) 0.005(3) 0.022(3) 
C31 0.024(3) 0.075(6) 0.033(4) 0.000(4) 0.007(3) 0.003(4) 
C32 0.041(4) 0.047(5) 0.069(5) 0.009(4) 0.038(4) 0.004(4) 
C28 0.037(4) 0.071(6) 0.053(5) -0.027(4) 0.028(4) -0.011(4) 
C29 0.039(4) 0.061(5) 0.053(5) 0.013(4) 0.028(4) -0.002(4) 
C30 0.039(4) 0.058(5) 0.061(5) -0.010(4) 0.030(4) -0.014(4) 
C21 0.050(5) 0.066(6) 0.075(6) 0.040(5) 0.048(5) 0.021(4) 
C22 0.046(4) 0.030(4) 0.103(7) -0.017(4) 0.049(5) -0.011(4) 
C23 0.028(4) 0.083(7) 0.046(5) -0.002(4) 0.017(3) 0.005(4) 
C24 0.065(5) 0.030(4) 0.095(7) 0.013(5) 0.052(5) 0.018(4) 
C20 0.048(4) 0.063(6) 0.070(6) -0.025(5) 0.041(4) -0.011(4) 
C15 0.028(3) 0.057(5) 0.041(4) -0.008(4) 0.011(3) -0.005(3) 
C16 0.042(4) 0.049(5) 0.056(5) -0.001(4) 0.032(4) -0.001(4) 
C12 0.042(4) 0.086(7) 0.035(4) 0.000(4) 0.025(3) -0.005(4) 
C13 0.037(4) 0.067(6) 0.076(6) 0.041(5) 0.031(4) 0.004(4) 
C14 0.045(4) 0.037(4) 0.100(7) -0.014(5) 0.042(5) -0.008(4) 
C6 0.057(5) 0.070(6) 0.031(4) -0.005(4) 0.003(4) 0.009(5) 
C7 0.035(4) 0.087(7) 0.037(4) 0.019(4) 0.016(3) -0.001(4) 
C8 0.072(6) 0.039(5) 0.037(4) 0.009(4) -0.019(4) -0.005(5) 
C4 0.028(4) 0.120(9) 0.028(4) 0.016(5) 0.006(3) 0.026(5) 
C5 0.039(4) 0.067(6) 0.034(4) 0.010(4) -0.006(3) -0.029(4) 
C27 0.030(3) 0.032(4) 0.031(3) 0.001(3) 0.016(3) -0.003(3) 
C25 0.029(3) 0.041(4) 0.026(3) 0.002(3) 0.008(3) -0.008(3) 
C26 0.030(3) 0.038(4) 0.033(4) -0.008(3) 0.016(3) 0.001(3) 
C19 0.037(3) 0.033(4) 0.032(4) -0.001(3) 0.016(3) -0.005(3) 
C18 0.033(3) 0.037(4) 0.033(4) -0.002(3) 0.014(3) -0.001(3) 
C17 0.029(3) 0.028(4) 0.031(3) 0.001(3) 0.012(3) -0.003(3) 
C11 0.033(3) 0.037(4) 0.036(4) 0.001(3) 0.016(3) -0.007(3) 
C10 0.039(4) 0.038(4) 0.034(4) -0.004(3) 0.018(3) -0.001(3) 
C9 0.041(4) 0.038(4) 0.037(4) 0.000(3) 0.020(3) -0.004(3) 
C3 0.037(4) 0.043(4) 0.032(4) -0.002(3) 0.015(3) 0.006(3) 
C1 0.035(4) 0.036(4) 0.043(4) -0.007(3) 0.011(3) -0.008(3) 
C2 0.048(4) 0.034(4) 0.039(4) 0.005(3) 0.007(3) 0.016(4) 
C34 0.041(4) 0.057(5) 0.063(5) -0.013(4) 0.031(4) -0.009(4) 
C35 0.038(4) 0.049(5) 0.054(5) -0.006(4) 0.012(4) 0.004(4) 
C36 0.043(4) 0.059(5) 0.041(4) -0.012(4) 0.021(3) -0.005(4) 
C37 0.038(4) 0.047(5) 0.054(5) -0.002(4) 0.023(4) -0.004(4) 
C38 0.039(4) 0.041(4) 0.061(5) -0.002(4) 0.019(4) -0.006(3) 
C33 0.062(5) 0.050(5) 0.040(4) -0.006(4) 0.027(4) -0.022(4) 
C39 0.122(9) 0.093(8) 0.078(7) -0.015(6) 0.067(7) -0.032(7) 
 
_geom_special_details 
; 
 All esds (except the esd in the dihedral angle between two l.s. planes) 
 are estimated using the full covariance matrix.  The cell esds are taken 
 into account individually in the estimation of esds in distances, angles 
 and torsion angles; correlations between esds in cell parameters are only 
 used when they are defined by crystal symmetry.  An approximate (isotropic) 
 treatment of cell esds is used for estimating esds involving l.s. planes. 
; 
 
loop_ 
 _geom_bond_atom_site_label_1 
 _geom_bond_atom_site_label_2 
 _geom_bond_distance 
 _geom_bond_site_symmetry_2 
 _geom_bond_publ_flag 
Ag1 C2 2.533(7) . ? 
Ag1 C1 2.652(7) . ? 
Ag1 C26 2.706(6) . ? 
Ag1 Cu1 2.7339(11) . ? 
Ag1 Mo1 2.8302(11) . ? 
Ag1 Mo4 2.8333(8) . ? 
Ag1 Ag2 2.9093(8) . ? 
Ag2 C9 2.578(7) . ? 
Ag2 C10 2.588(7) . ? 
Ag2 C1 2.694(7) . ? 
Ag2 Mo1 2.7548(7) . ? 
Ag2 Mo2 2.7781(7) . ? 
Ag2 Ag3 2.9351(11) . ? 
Ag3 C10 2.616(7) . ? 
Ag3 Cu1 2.8143(9) . ? 
Ag3 Mo3 2.8419(9) . ? 
Ag3 Mo2 2.8454(7) . ? 
Mo1 C3 1.968(7) . ? 
Mo1 C2 1.998(8) . ? 
Mo1 C1 2.023(8) . ? 
Mo1 C5 2.294(7) . ? 
Mo1 C4 2.304(6) . ? 
Mo1 C8 2.322(7) . ? 
Mo1 C6 2.326(8) . ? 
Mo1 C7 2.335(7) . ? 
Mo2 C11 1.981(6) . ? 
Mo2 C10 1.990(7) . ? 
Mo2 C9 1.991(7) . ? 
Mo2 C13 2.308(7) . ? 
Mo2 C12 2.312(7) . ? 
Mo2 C14 2.316(7) . ? 
Mo2 C16 2.334(6) . ? 
Mo2 C15 2.354(6) . ? 
Mo3 C19 1.970(7) . ? 
Mo3 C17 1.993(7) . ? 
Mo3 C18 1.994(6) . ? 
Mo3 C23 2.310(7) . ? 
Mo3 C22 2.331(7) . ? 
Mo3 C20 2.334(7) . ? 
Mo3 C24 2.337(7) . ? 
Mo3 C21 2.339(7) . ? 
Mo3 Cu1 2.6372(8) . ? 
Mo4 C27 1.978(6) . ? 
Mo4 C25 1.994(8) . ? 
Mo4 C26 1.996(7) . ? 
Mo4 C29 2.296(7) . ? 
Mo4 C28 2.305(7) . ? 
Mo4 C30 2.327(7) . ? 
Mo4 C32 2.337(7) . ? 
Mo4 C31 2.366(6) . ? 
Mo4 Cu1 2.6412(9) . ? 
Cu1 C18 2.285(7) . ? 
Cu1 C26 2.312(6) . ? 
Cu1 C17 2.339(6) . ? 
Cu1 C25 2.376(6) . ? 
O1 C27 1.150(7) . ? 
O2 C25 1.158(8) . ? 
O3 C26 1.160(8) . ? 
O4 C19 1.145(7) . ? 
O5 C18 1.150(7) . ? 
O6 C17 1.159(7) . ? 
O7 C11 1.149(7) . ? 
O8 C10 1.160(8) . ? 
O9 C9 1.158(8) . ? 
O10 C3 1.157(8) . ? 
O11 C1 1.140(8) . ? 
O12 C2 1.150(8) . ? 
C31 C32 1.390(10) . ? 
C31 C30 1.391(11) . ? 
C31 H31 0.9500 . ? 
C32 C28 1.386(11) . ? 
C32 H32 0.9500 . ? 
C28 C29 1.414(11) . ? 
C28 H28 0.9500 . ? 
C29 C30 1.405(11) . ? 
C29 H29 0.9500 . ? 
C30 H30 0.9500 . ? 
C21 C22 1.419(12) . ? 
C21 C20 1.434(11) . ? 
C21 H21 0.9500 . ? 
C22 C23 1.384(11) . ? 
C22 H22 0.9500 . ? 
C23 C24 1.374(11) . ? 
C23 H23 0.9500 . ? 
C24 C20 1.396(11) . ? 
C24 H24 0.9500 . ? 
C20 H20 0.9500 . ? 
C15 C16 1.388(10) . ? 
C15 C14 1.400(10) . ? 
C15 H15 0.9500 . ? 
C16 C12 1.414(10) . ? 
C16 H16 0.9500 . ? 
C12 C13 1.398(11) . ? 
C12 H12 0.9500 . ? 
C13 C14 1.378(12) . ? 
C13 H13 0.9500 . ? 
C14 H14 0.9500 . ? 
C6 C7 1.348(12) . ? 
C6 C5 1.380(12) . ? 
C6 H6 0.9500 . ? 
C7 C8 1.362(12) . ? 
C7 H7 0.9500 . ? 
C8 C4 1.408(12) . ? 
C8 H8 0.9500 . ? 
C4 C5 1.402(12) . ? 
C4 H4 0.9500 . ? 
C5 H5 0.9500 . ? 
C34 C33 1.382(11) . ? 
C34 C35 1.409(11) . ? 
C34 H34 0.9500 . ? 
C35 C36 1.367(10) . ? 
C35 H35 0.9500 . ? 
C36 C37 1.391(10) . ? 
C36 H36 0.9500 . ? 
C37 C38 1.338(10) . ? 
C37 H37 0.9500 . ? 
C38 C33 1.408(10) . ? 
C38 H38 0.9500 . ? 
C33 C39 1.469(11) . ? 
C39 H39A 0.9800 . ? 
C39 H39B 0.9800 . ? 
C39 H39C 0.9800 . ? 
 
loop_ 
 _geom_angle_atom_site_label_1 
 _geom_angle_atom_site_label_2 
 _geom_angle_atom_site_label_3 
 _geom_angle 
 _geom_angle_site_symmetry_1 
 _geom_angle_site_symmetry_3 
 _geom_angle_publ_flag 
C2 Ag1 C1 83.9(2) . . ? 
C2 Ag1 C26 89.8(2) . . ? 
C1 Ag1 C26 153.8(2) . . ? 
C2 Ag1 Cu1 134.52(17) . . ? 
C1 Ag1 Cu1 121.07(16) . . ? 
C26 Ag1 Cu1 50.29(13) . . ? 
C2 Ag1 Mo1 43.31(17) . . ? 
C1 Ag1 Mo1 43.16(16) . . ? 
C26 Ag1 Mo1 132.55(15) . . ? 
Cu1 Ag1 Mo1 155.99(3) . . ? 
C2 Ag1 Mo4 111.00(18) . . ? 
C1 Ag1 Mo4 161.20(16) . . ? 
C26 Ag1 Mo4 42.15(15) . . ? 
Cu1 Ag1 Mo4 56.61(3) . . ? 
Mo1 Ag1 Mo4 145.26(3) . . ? 
C2 Ag1 Ag2 59.77(18) . . ? 
C1 Ag1 Ag2 57.73(15) . . ? 
C26 Ag1 Ag2 97.26(15) . . ? 
Cu1 Ag1 Ag2 99.68(3) . . ? 
Mo1 Ag1 Ag2 57.349(18) . . ? 
Mo4 Ag1 Ag2 139.38(2) . . ? 
C9 Ag2 C10 82.3(2) . . ? 
C9 Ag2 C1 163.6(2) . . ? 
C10 Ag2 C1 89.7(2) . . ? 
C9 Ag2 Mo1 147.47(16) . . ? 
C10 Ag2 Mo1 130.06(16) . . ? 
C1 Ag2 Mo1 43.57(16) . . ? 
C9 Ag2 Mo2 43.43(16) . . ? 
C10 Ag2 Mo2 43.36(16) . . ? 
C1 Ag2 Mo2 132.49(16) . . ? 
Mo1 Ag2 Mo2 160.07(3) . . ? 
C9 Ag2 Ag1 114.40(15) . . ? 
C10 Ag2 Ag1 114.41(16) . . ? 
C1 Ag2 Ag1 56.35(16) . . ? 
Mo1 Ag2 Ag1 59.88(2) . . ? 
Mo2 Ag2 Ag1 138.48(3) . . ? 
C9 Ag2 Ag3 58.87(15) . . ? 
C10 Ag2 Ag3 56.12(14) . . ? 
C1 Ag2 Ag3 104.84(15) . . ? 
Mo1 Ag2 Ag3 137.16(3) . . ? 
Mo2 Ag2 Ag3 59.665(17) . . ? 
Ag1 Ag2 Ag3 78.83(2) . . ? 
C10 Ag3 Cu1 129.60(16) . . ? 
C10 Ag3 Mo3 119.96(16) . . ? 
Cu1 Ag3 Mo3 55.580(19) . . ? 
C10 Ag3 Mo2 42.49(16) . . ? 
Cu1 Ag3 Mo2 154.13(2) . . ? 
Mo3 Ag3 Mo2 148.61(2) . . ? 
C10 Ag3 Ag2 55.22(14) . . ? 
Cu1 Ag3 Ag2 97.22(2) . . ? 
Mo3 Ag3 Ag2 142.98(3) . . ? 
Mo2 Ag3 Ag2 57.42(2) . . ? 
C3 Mo1 C2 92.2(3) . . ? 
C3 Mo1 C1 88.3(3) . . ? 
C2 Mo1 C1 119.2(3) . . ? 
C3 Mo1 C5 88.1(3) . . ? 
C2 Mo1 C5 132.5(3) . . ? 
C1 Mo1 C5 108.3(3) . . ? 
C3 Mo1 C4 96.7(3) . . ? 
C2 Mo1 C4 97.7(3) . . ? 
C1 Mo1 C4 142.7(3) . . ? 
C5 Mo1 C4 35.5(3) . . ? 
C3 Mo1 C8 131.5(3) . . ? 
C2 Mo1 C8 88.6(3) . . ? 
C1 Mo1 C8 132.3(4) . . ? 
C5 Mo1 C8 57.9(3) . . ? 
C4 Mo1 C8 35.4(3) . . ? 
C3 Mo1 C6 114.3(3) . . ? 
C2 Mo1 C6 144.6(3) . . ? 
C1 Mo1 C6 86.1(3) . . ? 
C5 Mo1 C6 34.7(3) . . ? 
C4 Mo1 C6 58.1(3) . . ? 
C8 Mo1 C6 56.5(3) . . ? 
C3 Mo1 C7 145.3(3) . . ? 
C2 Mo1 C7 113.1(3) . . ? 
C1 Mo1 C7 98.5(3) . . ? 
C5 Mo1 C7 57.4(3) . . ? 
C4 Mo1 C7 58.2(3) . . ? 
C8 Mo1 C7 34.0(3) . . ? 
C6 Mo1 C7 33.6(3) . . ? 
C3 Mo1 Ag2 130.82(19) . . ? 
C2 Mo1 Ag2 68.0(2) . . ? 
C1 Mo1 Ag2 66.62(19) . . ? 
C5 Mo1 Ag2 138.8(2) . . ? 
C4 Mo1 Ag2 129.2(3) . . ? 
C8 Mo1 Ag2 94.1(2) . . ? 
C6 Mo1 Ag2 105.7(3) . . ? 
C7 Mo1 Ag2 82.24(18) . . ? 
C3 Mo1 Ag1 68.28(19) . . ? 
C2 Mo1 Ag1 60.40(19) . . ? 
C1 Mo1 Ag1 63.7(2) . . ? 
C5 Mo1 Ag1 154.7(2) . . ? 
C4 Mo1 Ag1 151.4(2) . . ? 
C8 Mo1 Ag1 145.94(19) . . ? 
C6 Mo1 Ag1 149.8(2) . . ? 
C7 Mo1 Ag1 144.56(17) . . ? 
Ag2 Mo1 Ag1 62.77(2) . . ? 
C11 Mo2 C10 95.1(3) . . ? 
C11 Mo2 C9 92.5(3) . . ? 
C10 Mo2 C9 117.3(3) . . ? 
C11 Mo2 C13 88.1(3) . . ? 
C10 Mo2 C13 136.3(3) . . ? 
C9 Mo2 C13 106.0(3) . . ? 
C11 Mo2 C12 91.1(3) . . ? 
C10 Mo2 C12 101.1(3) . . ? 
C9 Mo2 C12 140.9(3) . . ? 
C13 Mo2 C12 35.2(3) . . ? 
C11 Mo2 C14 117.1(3) . . ? 
C10 Mo2 C14 140.4(3) . . ? 
C9 Mo2 C14 85.5(3) . . ? 
C13 Mo2 C14 34.7(3) . . ? 
C12 Mo2 C14 58.6(3) . . ? 
C11 Mo2 C16 124.3(3) . . ? 
C10 Mo2 C16 85.4(3) . . ? 
C9 Mo2 C16 136.1(3) . . ? 
C13 Mo2 C16 58.1(3) . . ? 
C12 Mo2 C16 35.4(3) . . ? 
C14 Mo2 C16 58.1(3) . . ? 
C11 Mo2 C15 145.2(3) . . ? 
C10 Mo2 C15 105.9(3) . . ? 
C9 Mo2 C15 101.7(3) . . ? 
C13 Mo2 C15 57.6(3) . . ? 
C12 Mo2 C15 58.2(2) . . ? 
C14 Mo2 C15 34.9(3) . . ? 
C16 Mo2 C15 34.4(2) . . ? 
C11 Mo2 Ag2 67.77(19) . . ? 
C10 Mo2 Ag2 63.23(19) . . ? 
C9 Mo2 Ag2 62.93(19) . . ? 
C13 Mo2 Ag2 151.96(19) . . ? 
C12 Mo2 Ag2 151.02(19) . . ? 
C14 Mo2 Ag2 148.4(2) . . ? 
C16 Mo2 Ag2 148.05(19) . . ? 
C15 Mo2 Ag2 146.68(19) . . ? 
C11 Mo2 Ag3 130.68(19) . . ? 
C10 Mo2 Ag3 62.59(19) . . ? 
C9 Mo2 Ag3 65.9(2) . . ? 
C13 Mo2 Ag3 139.1(2) . . ? 
C12 Mo2 Ag3 134.0(2) . . ? 
C14 Mo2 Ag3 105.3(2) . . ? 
C16 Mo2 Ag3 98.62(19) . . ? 
C15 Mo2 Ag3 83.96(19) . . ? 
Ag2 Mo2 Ag3 62.91(3) . . ? 
C19 Mo3 C17 85.3(3) . . ? 
C19 Mo3 C18 90.6(3) . . ? 
C17 Mo3 C18 114.4(2) . . ? 
C19 Mo3 C23 90.8(3) . . ? 
C17 Mo3 C23 106.4(3) . . ? 
C18 Mo3 C23 139.1(3) . . ? 
C19 Mo3 C22 120.4(3) . . ? 
C17 Mo3 C22 90.1(2) . . ? 
C18 Mo3 C22 142.7(3) . . ? 
C23 Mo3 C22 34.7(3) . . ? 
C19 Mo3 C20 123.0(3) . . ? 
C17 Mo3 C20 145.0(3) . . ? 
C18 Mo3 C20 87.7(3) . . ? 
C23 Mo3 C20 58.1(3) . . ? 
C22 Mo3 C20 59.0(3) . . ? 
C19 Mo3 C24 92.2(3) . . ? 
C17 Mo3 C24 140.8(3) . . ? 
C18 Mo3 C24 104.7(3) . . ? 
C23 Mo3 C24 34.4(3) . . ? 
C22 Mo3 C24 57.8(3) . . ? 
C20 Mo3 C24 34.8(3) . . ? 
C19 Mo3 C21 147.9(3) . . ? 
C17 Mo3 C21 109.4(3) . . ? 
C18 Mo3 C21 107.6(3) . . ? 
C23 Mo3 C21 58.1(3) . . ? 
C22 Mo3 C21 35.4(3) . . ? 
C20 Mo3 C21 35.7(3) . . ? 
C24 Mo3 C21 58.2(3) . . ? 
C19 Mo3 Cu1 75.04(19) . . ? 
C17 Mo3 Cu1 58.72(17) . . ? 
C18 Mo3 Cu1 57.13(19) . . ? 
C23 Mo3 Cu1 159.7(2) . . ? 
C22 Mo3 Cu1 145.35(18) . . ? 
C20 Mo3 Cu1 142.1(2) . . ? 
C24 Mo3 Cu1 156.8(2) . . ? 
C21 Mo3 Cu1 137.01(18) . . ? 
C19 Mo3 Ag3 136.26(19) . . ? 
C17 Mo3 Ag3 67.71(17) . . ? 
C18 Mo3 Ag3 71.95(19) . . ? 
C23 Mo3 Ag3 128.7(2) . . ? 
C22 Mo3 Ag3 94.4(2) . . ? 
C20 Mo3 Ag3 96.7(2) . . ? 
C24 Mo3 Ag3 130.6(2) . . ? 
C21 Mo3 Ag3 75.49(18) . . ? 
Cu1 Mo3 Ag3 61.68(2) . . ? 
C27 Mo4 C25 87.4(2) . . ? 
C27 Mo4 C26 88.4(2) . . ? 
C25 Mo4 C26 115.6(3) . . ? 
C27 Mo4 C29 96.7(3) . . ? 
C25 Mo4 C29 99.8(3) . . ? 
C26 Mo4 C29 144.5(3) . . ? 
C27 Mo4 C28 90.0(3) . . ? 
C25 Mo4 C28 134.7(3) . . ? 
C26 Mo4 C28 109.5(3) . . ? 
C29 Mo4 C28 35.8(3) . . ? 
C27 Mo4 C30 130.6(3) . . ? 
C25 Mo4 C30 90.2(3) . . ? 
C26 Mo4 C30 135.5(3) . . ? 
C29 Mo4 C30 35.4(3) . . ? 
C28 Mo4 C30 58.7(3) . . ? 
C27 Mo4 C32 117.0(3) . . ? 
C25 Mo4 C32 147.5(3) . . ? 
C26 Mo4 C32 87.9(2) . . ? 
C29 Mo4 C32 58.5(3) . . ? 
C28 Mo4 C32 34.7(3) . . ? 
C30 Mo4 C32 57.9(3) . . ? 
C27 Mo4 C31 147.6(3) . . ? 
C25 Mo4 C31 114.8(3) . . ? 
C26 Mo4 C31 101.4(3) . . ? 
C29 Mo4 C31 58.0(3) . . ? 
C28 Mo4 C31 57.6(2) . . ? 
C30 Mo4 C31 34.5(3) . . ? 
C32 Mo4 C31 34.4(3) . . ? 
C27 Mo4 Cu1 72.59(18) . . ? 
C25 Mo4 Cu1 59.74(18) . . ? 
C26 Mo4 Cu1 57.82(18) . . ? 
C29 Mo4 Cu1 156.5(2) . . ? 
C28 Mo4 Cu1 157.90(18) . . ? 
C30 Mo4 Cu1 143.4(2) . . ? 
C32 Mo4 Cu1 144.94(18) . . ? 
C31 Mo4 Cu1 138.37(18) . . ? 
C27 Mo4 Ag1 132.34(18) . . ? 
C25 Mo4 Ag1 71.31(18) . . ? 
C26 Mo4 Ag1 65.52(18) . . ? 
C29 Mo4 Ag1 128.0(2) . . ? 
C28 Mo4 Ag1 135.2(2) . . ? 
C30 Mo4 Ag1 92.7(2) . . ? 
C32 Mo4 Ag1 101.8(2) . . ? 
C31 Mo4 Ag1 79.02(18) . . ? 
Cu1 Mo4 Ag1 59.80(3) . . ? 
C18 Cu1 C26 153.6(2) . . ? 
C18 Cu1 C17 92.9(2) . . ? 
C26 Cu1 C17 96.0(2) . . ? 
C18 Cu1 C25 93.6(2) . . ? 
C26 Cu1 C25 92.1(2) . . ? 
C17 Cu1 C25 147.3(2) . . ? 
C18 Cu1 Mo3 47.12(16) . . ? 
C26 Cu1 Mo3 140.68(17) . . ? 
C17 Cu1 Mo3 46.76(16) . . ? 
C25 Cu1 Mo3 125.62(18) . . ? 
C18 Cu1 Mo4 138.28(17) . . ? 
C26 Cu1 Mo4 46.94(17) . . ? 
C17 Cu1 Mo4 126.63(16) . . ? 
C25 Cu1 Mo4 46.48(18) . . ? 
Mo3 Cu1 Mo4 160.09(4) . . ? 
C18 Cu1 Ag1 94.15(16) . . ? 
C26 Cu1 Ag1 64.24(15) . . ? 
C17 Cu1 Ag1 142.63(15) . . ? 
C25 Cu1 Ag1 68.63(15) . . ? 
Mo3 Cu1 Ag1 134.75(3) . . ? 
Mo4 Cu1 Ag1 63.59(2) . . ? 
C18 Cu1 Ag3 69.03(17) . . ? 
C26 Cu1 Ag3 92.65(17) . . ? 
C17 Cu1 Ag3 64.65(15) . . ? 
C25 Cu1 Ag3 146.62(15) . . ? 
Mo3 Cu1 Ag3 62.74(3) . . ? 
Mo4 Cu1 Ag3 135.47(3) . . ? 
Ag1 Cu1 Ag3 83.94(3) . . ? 
C32 C31 C30 108.5(7) . . ? 
C32 C31 Mo4 71.7(4) . . ? 
C30 C31 Mo4 71.3(4) . . ? 
C32 C31 H31 125.7 . . ? 
C30 C31 H31 125.7 . . ? 
Mo4 C31 H31 123.0 . . ? 
C28 C32 C31 108.4(7) . . ? 
C28 C32 Mo4 71.4(4) . . ? 
C31 C32 Mo4 74.0(4) . . ? 
C28 C32 H32 125.8 . . ? 
C31 C32 H32 125.8 . . ? 
Mo4 C32 H32 120.6 . . ? 
C32 C28 C29 107.9(7) . . ? 
C32 C28 Mo4 73.9(4) . . ? 
C29 C28 Mo4 71.8(4) . . ? 
C32 C28 H28 126.1 . . ? 
C29 C28 H28 126.1 . . ? 
Mo4 C28 H28 120.1 . . ? 
C30 C29 C28 107.3(7) . . ? 
C30 C29 Mo4 73.5(4) . . ? 
C28 C29 Mo4 72.4(4) . . ? 
C30 C29 H29 126.4 . . ? 
C28 C29 H29 126.4 . . ? 
Mo4 C29 H29 119.6 . . ? 
C31 C30 C29 107.9(7) . . ? 
C31 C30 Mo4 74.3(4) . . ? 
C29 C30 Mo4 71.1(4) . . ? 
C31 C30 H30 126.1 . . ? 
C29 C30 H30 126.1 . . ? 
Mo4 C30 H30 120.4 . . ? 
C22 C21 C20 107.2(7) . . ? 
C22 C21 Mo3 72.0(4) . . ? 
C20 C21 Mo3 71.9(4) . . ? 
C22 C21 H21 126.4 . . ? 
C20 C21 H21 126.4 . . ? 
Mo3 C21 H21 121.4 . . ? 
C23 C22 C21 107.3(7) . . ? 
C23 C22 Mo3 71.8(4) . . ? 
C21 C22 Mo3 72.6(4) . . ? 
C23 C22 H22 126.4 . . ? 
C21 C22 H22 126.4 . . ? 
Mo3 C22 H22 121.0 . . ? 
C24 C23 C22 109.9(7) . . ? 
C24 C23 Mo3 73.9(4) . . ? 
C22 C23 Mo3 73.5(4) . . ? 
C24 C23 H23 125.1 . . ? 
C22 C23 H23 125.1 . . ? 
Mo3 C23 H23 119.3 . . ? 
C23 C24 C20 108.8(7) . . ? 
C23 C24 Mo3 71.7(4) . . ? 
C20 C24 Mo3 72.5(4) . . ? 
C23 C24 H24 125.6 . . ? 
C20 C24 H24 125.6 . . ? 
Mo3 C24 H24 121.8 . . ? 
C24 C20 C21 106.8(7) . . ? 
C24 C20 Mo3 72.7(4) . . ? 
C21 C20 Mo3 72.3(4) . . ? 
C24 C20 H20 126.6 . . ? 
C21 C20 H20 126.6 . . ? 
Mo3 C20 H20 120.3 . . ? 
C16 C15 C14 108.1(7) . . ? 
C16 C15 Mo2 72.0(4) . . ? 
C14 C15 Mo2 71.1(4) . . ? 
C16 C15 H15 126.0 . . ? 
C14 C15 H15 126.0 . . ? 
Mo2 C15 H15 122.7 . . ? 
C15 C16 C12 108.2(7) . . ? 
C15 C16 Mo2 73.6(4) . . ? 
C12 C16 Mo2 71.5(4) . . ? 
C15 C16 H16 125.9 . . ? 
C12 C16 H16 125.9 . . ? 
Mo2 C16 H16 120.8 . . ? 
C13 C12 C16 106.5(7) . . ? 
C13 C12 Mo2 72.2(4) . . ? 
C16 C12 Mo2 73.1(4) . . ? 
C13 C12 H12 126.7 . . ? 
C16 C12 H12 126.7 . . ? 
Mo2 C12 H12 119.9 . . ? 
C14 C13 C12 109.3(7) . . ? 
C14 C13 Mo2 73.0(4) . . ? 
C12 C13 Mo2 72.5(4) . . ? 
C14 C13 H13 125.3 . . ? 
C12 C13 H13 125.3 . . ? 
Mo2 C13 H13 120.8 . . ? 
C13 C14 C15 107.8(7) . . ? 
C13 C14 Mo2 72.3(4) . . ? 
C15 C14 Mo2 74.0(4) . . ? 
C13 C14 H14 126.1 . . ? 
C15 C14 H14 126.1 . . ? 
Mo2 C14 H14 119.4 . . ? 
C7 C6 C5 109.2(8) . . ? 
C7 C6 Mo1 73.6(5) . . ? 
C5 C6 Mo1 71.4(4) . . ? 
C7 C6 H6 125.4 . . ? 
C5 C6 H6 125.4 . . ? 
Mo1 C6 H6 121.3 . . ? 
C6 C7 C8 108.5(7) . . ? 
C6 C7 Mo1 72.8(5) . . ? 
C8 C7 Mo1 72.5(5) . . ? 
C6 C7 H7 125.8 . . ? 
C8 C7 H7 125.8 . . ? 
Mo1 C7 H7 120.7 . . ? 
C7 C8 C4 109.0(8) . . ? 
C7 C8 Mo1 73.5(4) . . ? 
C4 C8 Mo1 71.6(4) . . ? 
C7 C8 H8 125.5 . . ? 
C4 C8 H8 125.5 . . ? 
Mo1 C8 H8 121.1 . . ? 
C5 C4 C8 105.3(7) . . ? 
C5 C4 Mo1 71.9(4) . . ? 
C8 C4 Mo1 73.0(4) . . ? 
C5 C4 H4 127.3 . . ? 
C8 C4 H4 127.3 . . ? 
Mo1 C4 H4 119.9 . . ? 
C6 C5 C4 107.9(7) . . ? 
C6 C5 Mo1 73.9(4) . . ? 
C4 C5 Mo1 72.6(4) . . ? 
C6 C5 H5 126.1 . . ? 
C4 C5 H5 126.1 . . ? 
Mo1 C5 H5 119.3 . . ? 
O1 C27 Mo4 176.3(5) . . ? 
O2 C25 Mo4 168.8(6) . . ? 
O2 C25 Cu1 116.2(5) . . ? 
Mo4 C25 Cu1 73.8(2) . . ? 
O3 C26 Mo4 168.6(5) . . ? 
O3 C26 Cu1 115.8(5) . . ? 
Mo4 C26 Cu1 75.2(2) . . ? 
O3 C26 Ag1 114.1(5) . . ? 
Mo4 C26 Ag1 72.3(2) . . ? 
Cu1 C26 Ag1 65.48(16) . . ? 
O4 C19 Mo3 175.9(6) . . ? 
O5 C18 Mo3 169.2(6) . . ? 
O5 C18 Cu1 115.0(5) . . ? 
Mo3 C18 Cu1 75.7(2) . . ? 
O6 C17 Mo3 169.5(5) . . ? 
O6 C17 Cu1 114.8(5) . . ? 
Mo3 C17 Cu1 74.5(2) . . ? 
O7 C11 Mo2 173.1(6) . . ? 
O8 C10 Mo2 169.2(6) . . ? 
O8 C10 Ag2 116.7(5) . . ? 
Mo2 C10 Ag2 73.4(2) . . ? 
O8 C10 Ag3 111.6(5) . . ? 
Mo2 C10 Ag3 74.9(2) . . ? 
Ag2 C10 Ag3 68.66(17) . . ? 
O9 C9 Mo2 168.3(6) . . ? 
O9 C9 Ag2 116.8(5) . . ? 
Mo2 C9 Ag2 73.6(2) . . ? 
O10 C3 Mo1 173.6(6) . . ? 
O11 C1 Mo1 167.7(6) . . ? 
O11 C1 Ag1 117.7(5) . . ? 
Mo1 C1 Ag1 73.1(2) . . ? 
O11 C1 Ag2 119.0(5) . . ? 
Mo1 C1 Ag2 69.8(2) . . ? 
Ag1 C1 Ag2 65.92(16) . . ? 
O12 C2 Mo1 170.5(6) . . ? 
O12 C2 Ag1 112.9(5) . . ? 
Mo1 C2 Ag1 76.3(2) . . ? 
C33 C34 C35 120.0(7) . . ? 
C33 C34 H34 120.0 . . ? 
C35 C34 H34 120.0 . . ? 
C36 C35 C34 120.8(7) . . ? 
C36 C35 H35 119.6 . . ? 
C34 C35 H35 119.6 . . ? 
C35 C36 C37 118.3(7) . . ? 
C35 C36 H36 120.8 . . ? 
C37 C36 H36 120.8 . . ? 
C38 C37 C36 121.8(7) . . ? 
C38 C37 H37 119.1 . . ? 
C36 C37 H37 119.1 . . ? 
C37 C38 C33 121.2(7) . . ? 
C37 C38 H38 119.4 . . ? 
C33 C38 H38 119.4 . . ? 
C34 C33 C38 117.9(7) . . ? 
C34 C33 C39 121.4(8) . . ? 
C38 C33 C39 120.8(8) . . ? 
C33 C39 H39A 109.5 . . ? 
C33 C39 H39B 109.5 . . ? 
H39A C39 H39B 109.5 . . ? 
C33 C39 H39C 109.5 . . ? 
H39A C39 H39C 109.5 . . ? 
H39B C39 H39C 109.5 . . ? 
 

_diffrn_measured_fraction_theta_max    0.998 
_diffrn_reflns_theta_full              30.02 
_diffrn_measured_fraction_theta_full   0.998 
_refine_diff_density_max    1.456 
_refine_diff_density_min   -2.287 
_refine_diff_density_rms    0.210 
